# Supplementary material
Source: publisher figshare collection journal article supplement (https://acs.figshare.com/ndownloader/files/28624716)
Supplement: Supplementary file 1 [file 28624716]

# SUPPLEMENTARY INFORMATION

## Quantification and characterization of Ti-, Ce- and Ag-nanoparticles in global surface waters and precipitation

Agil Azimzada<sup>1,2</sup>, Ibrahim Jreije<sup>1</sup>, Madjid Hadioui<sup>1</sup>, Phil Shaw<sup>3</sup>, Jeffrey M. Farner<sup>4</sup>, Kevin J. Wilkinson<sup>1\*</sup>

<sup>1</sup>Department of Chemistry, University of Montreal, Montreal, QC H3C 3J7, Canada

<sup>2</sup>Department of Chemical Engineering, McGill University, Montreal, QC H3A 0C5, Canada

<sup>3</sup>Nu Instruments, Wrexham LL13 9XS, United Kingdom

<sup>4</sup>Department of Civil and Environmental Engineering, University of Alberta, Edmonton, AB T6G 1H9, Canada

**\* Correspondence:**

Kevin J. Wilkinson

Email: [kj.wilkinson@umontreal.ca](mailto:kj.wilkinson@umontreal.ca), Tel: +1 (514) 343-6741, Fax: +1 (514) 343-7586

**Keywords:** titania, ceria, silver, engineered nanoparticles, rain, surface waters, environmental impact

## Additional information on NP data processing

Data processing was performed using NuQuant version 2.2 (or NuQuant Vitesse prototype for simultaneous multi-element analysis). This method is extensively discussed in Hadioui *et al.*<sup>1</sup>, but can briefly be summarized as:

- Data smoothing
- Creating a peak search window that rolls over the span of the whole acquisition period
- Searching for a maximum (within a window) and establishing pre-max and post-max inflection points, where PEAK data points = in between pre-max and post-max inflection points
- Establishing local background (mean and SD) based on the remaining points in the window
- Calculating Net PEAK area (*i.e.* subtraction of equivalent background from PEAK raw data)
- Setting NP qualification criteria:  $I_{\text{thld}} = [\text{local background average}] + n \times [\text{local background standard deviation}]$ , where  $n$  was often set to 3 (in this case)
- PEAKs that meet the above criterion are now qualified as a “NP peak”
- Data can be viewed with respect to isotope type, intensity (counts) or full-width half-maximum (FWHM) values, which allows for flexible screening of possible artifacts

## Supplementary Figures

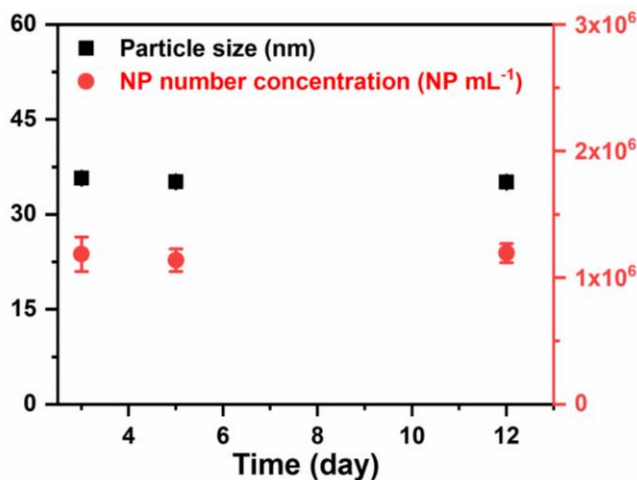

**Figure S1. Particle stability.** Time-resolved particle number concentrations and sizes as measured for TiO<sub>2</sub> NPs in a melted snow sample collected in Montreal, Quebec. Measurements were performed using a sector-field ICP-MS in a single particle mode, 3, 5 and 12 days following the filtration of the sample.

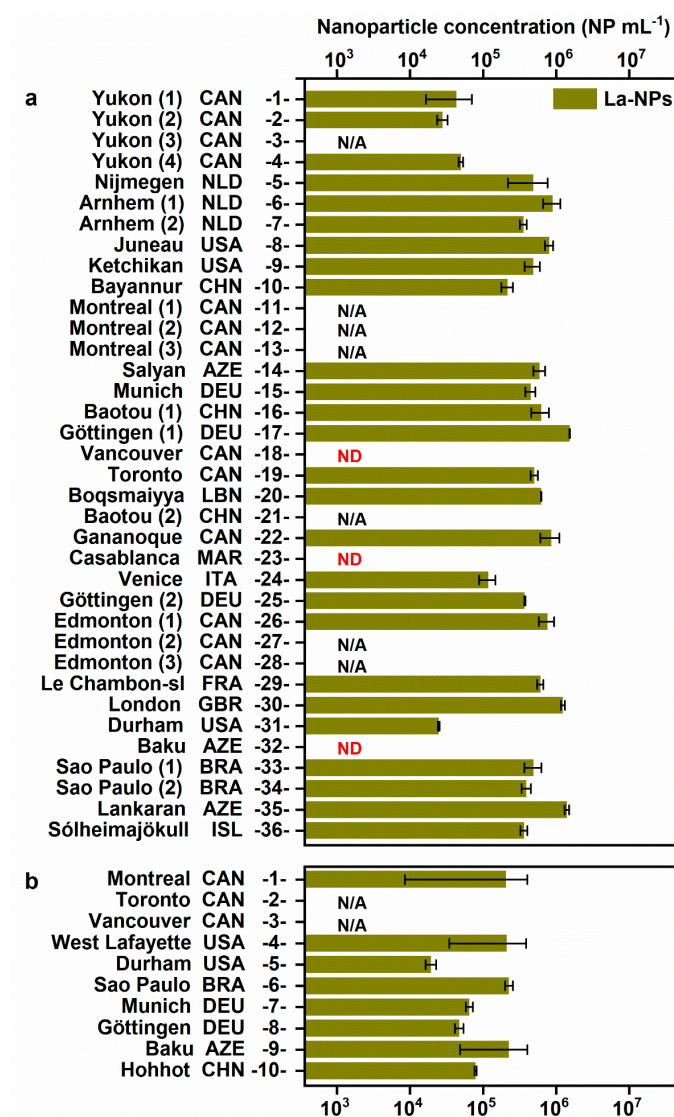

**Figure S2. Concentrations of La nanoparticles in global precipitation and surface waters. a,b,** Particle number concentrations for La-containing NPs as measured in surface waters (**a**) and precipitation (**b**) collected at 46 sampling sites across 13 countries. Sampling sites are indicated by city/province names and ISO country codes. Measurements were performed using a sector-field ICP-MS. ND stands for “not detected” and refers to concentrations below the detection limits of the technique. N/A refers to samples that were not analyzed.

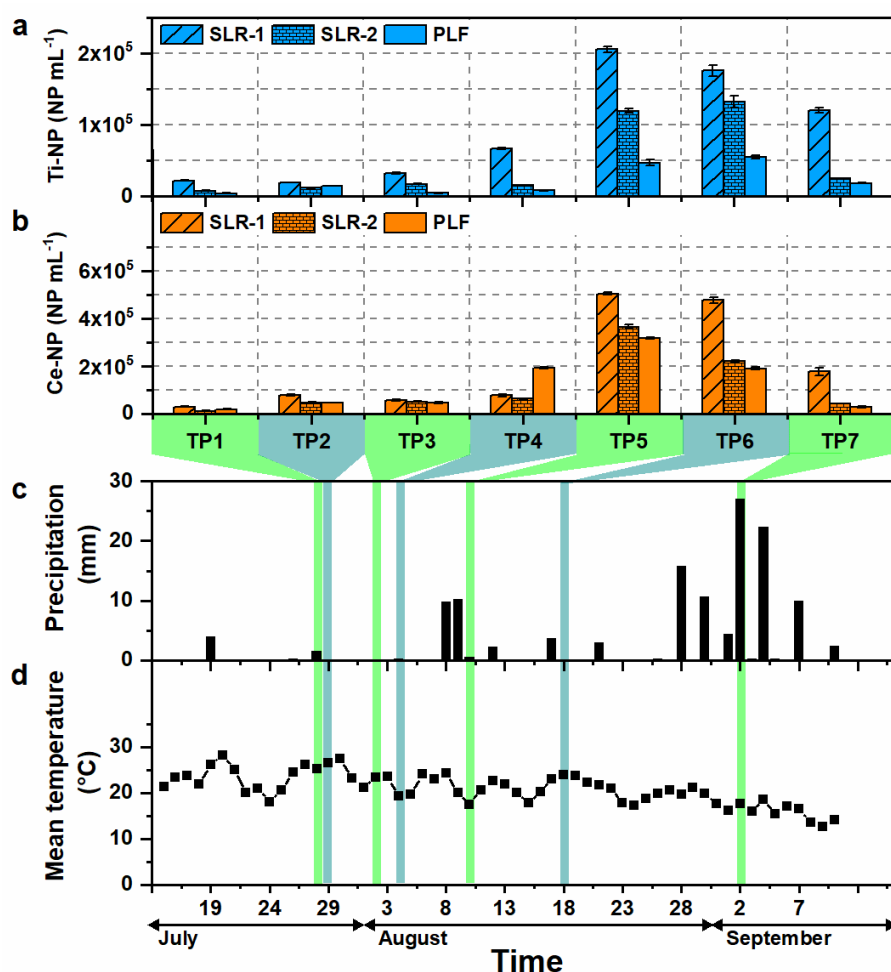

**Figure S3. Time-resolved measurements of nanoparticles in surface waters.** **a,b**, Particle number concentrations measured for Ti- (**a**) and Ce-containing (**b**) NPs in surface water samples collected from two sampling points at Saint Lawrence River (SLR) and a recreational pond in Parc La Fontaine (PLF) in Montreal (Quebec, Canada). Each timepoint (TP) refer to the date when the samplings were performed. **c,d**, Natural precipitation (**c**) and temperature (**d**) data are collected from the Montreal International Airport weather station (45°28'14.000" N, 73°44'27.000" W) and retrieved from the Environment and Climate Change Canada database. Measurements were performed using a sector-field ICP-MS.

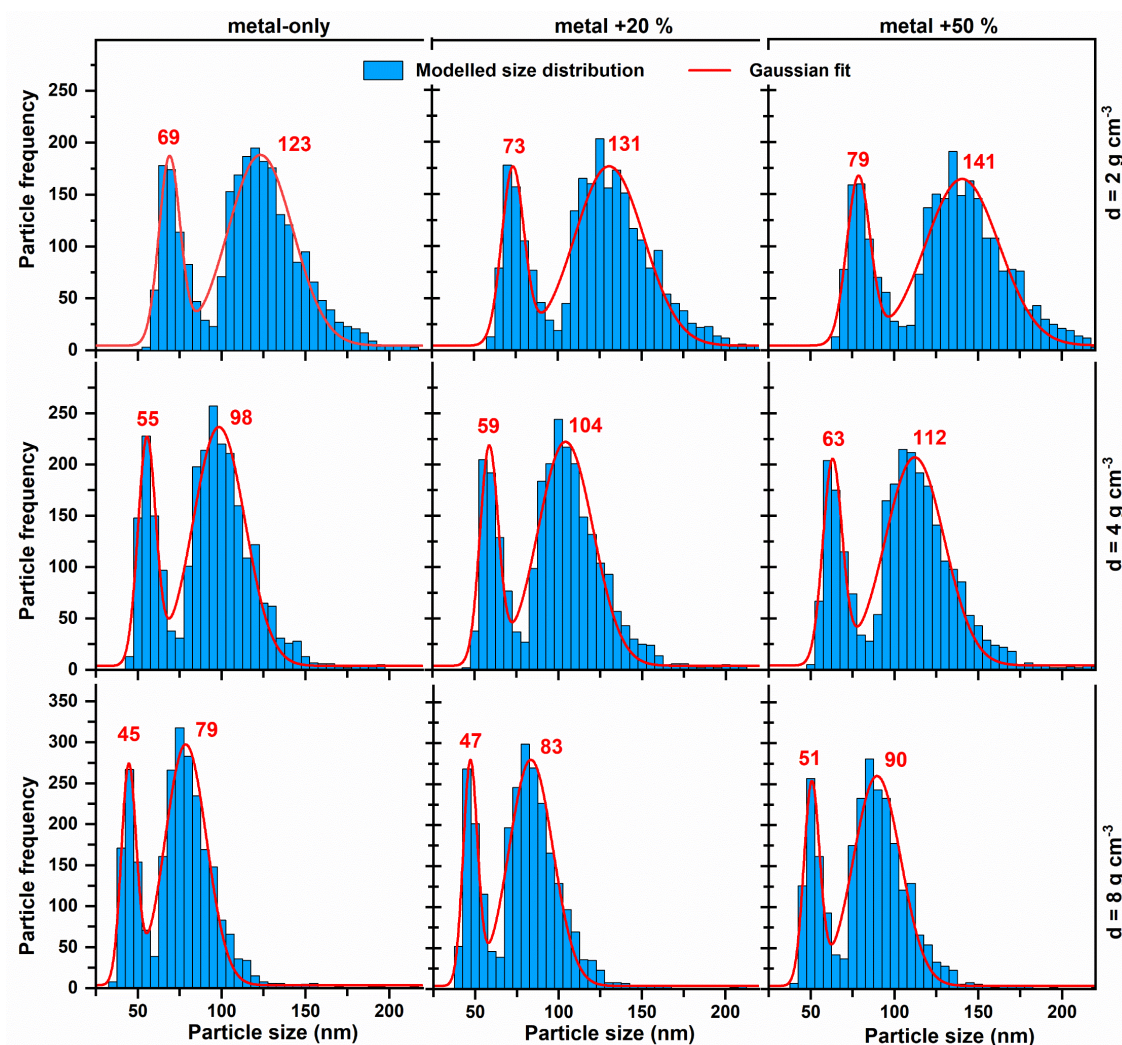

**Figure S4. Modelled size distributions taking into account multi-element nature of particles.** Modelled size distributions of NPs detected in snow from the Sólheimajökull glacier (ISL), assuming a range of particle densities (2-8 g cm<sup>-3</sup>). Given that the experimental determinations were limited to metals and metalloids only (*i.e.* excluded oxygen, halogens, etc.), particle sizes were predicted based upon the total masses of (almost) all metals/metalloids (*i.e.* 23-238 amu) detected in single particles (*i.e.* metal only). Total masses were assigned additional mass uncertainties of 20% (column 2) or 50% (column 3), due to the presence of the undetected elements. Data is fitted with Gaussian fit (red line), and the sizes corresponding to the peak maxima of the bimodal distributions are indicated. Measurements were performed with a single-particle time-of-flight ICP-MS.



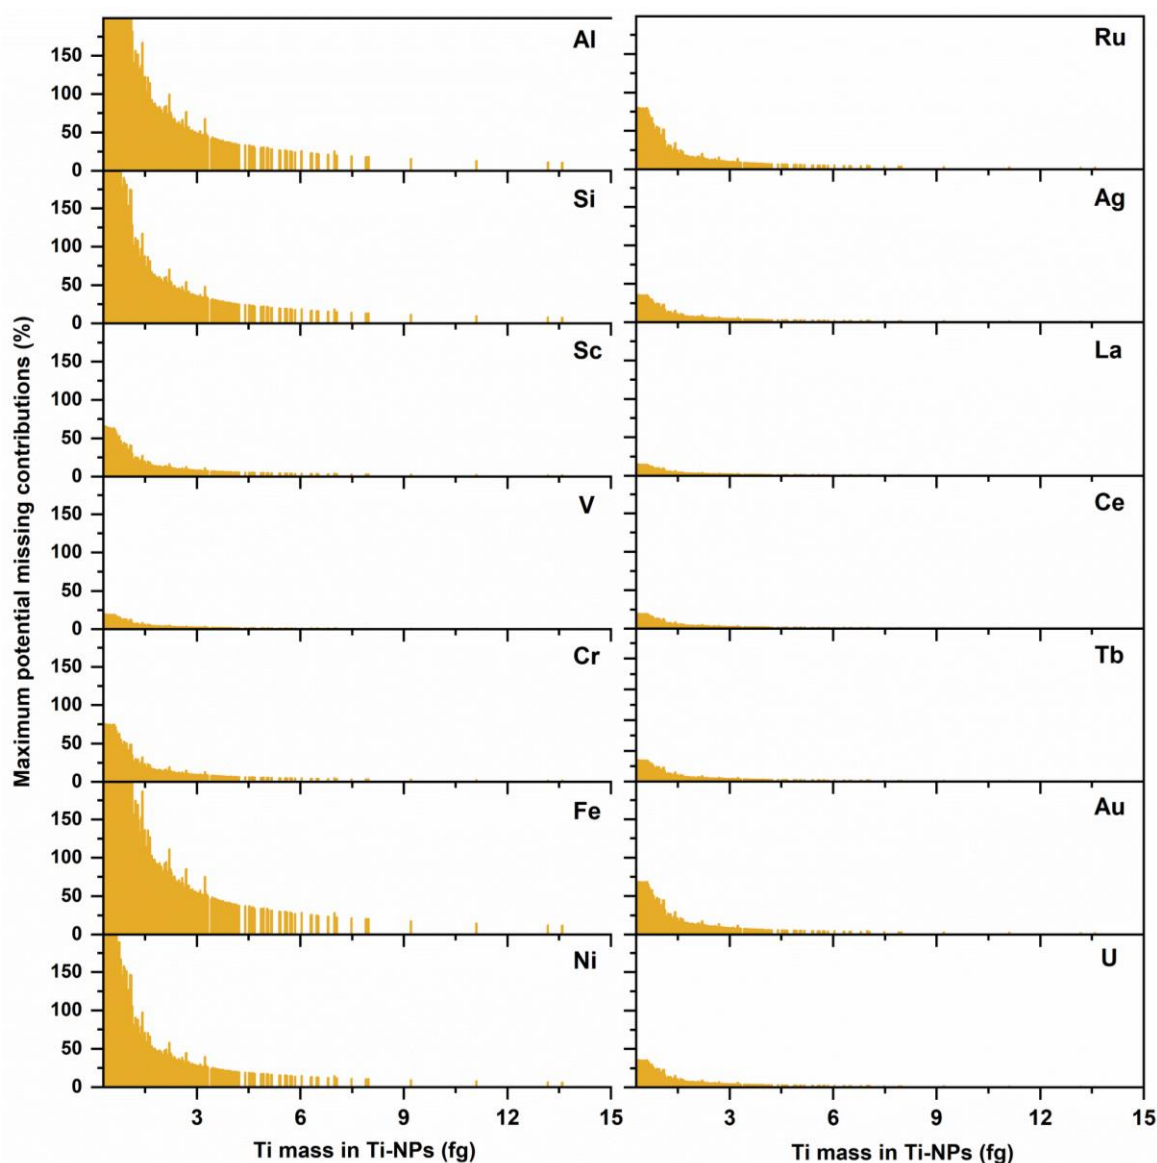

**Figure S5. Detection limits of the multi-element analysis.** Upper limits of the potential missing contributions of 14 metals in Ti-containing NPs, for cases in which Ti was detected as the only metallic component. % values are calculated based on the mass detection limit of each metal in relationship to the Ti content detected in individual Ti-containing NPs. Measurements were performed with single-particle time-of-flight ICP-MS, using 1953 NPs detected in a Montreal rainwater. In general, the probability of labelling a NP as pure  $\text{TiO}_2$  when it is not, increases for the very small particles and when detecting small quantities of the secondary elements with the poorest detection limits (Al, Si, Fe, Ni).

**Table S1. Sampling information for global surface water samples**

|    | Region/territory | Country |                | Water body                        | Sampling date<br>Year 2019 | Geo coordinates |            |
|----|------------------|---------|----------------|-----------------------------------|----------------------------|-----------------|------------|
|    |                  |         |                |                                   |                            | Longitude       | Latitude   |
| 1  | Yukon (1)        | CAN     | Canada         | Christmas Bay (Kluane Lake)       | May 29                     | -138.368602     | 61.0626    |
| 2  | Yukon (2)        | CAN     | Canada         | KLRS (Kluane Lake)                | May 31                     | -138.416049     | 61.027543  |
| 3  | Yukon (3)        | CAN     | Canada         | - (lake)                          | Jun 6                      | -138.372576     | 61.080076  |
| 4  | Yukon (4)        | CAN     | Canada         | - (lake)                          | Jun 6                      | -138.371875     | 61.069704  |
| 5  | Nijmegen         | NLD     | Netherlands    | Waal River                        | Jul 25                     | 5.858128        | 51.853724  |
| 6  | Arnhem (1)       | NLD     | Netherlands    | Nederrijn River                   | Jul 26                     | 5.907252        | 51.975722  |
| 7  | Arnhem (2)       | NLD     | Netherlands    | Grote Vijver Lake                 | Jul 26                     | 5.896827        | 51.995696  |
| 8  | Juneau           | USA     | United States  | Gold Creek                        | May 10                     | -134.419994     | 58.298831  |
| 9  | Ketchikan        | USA     | United States  | Ketchikan Creek                   | May 13                     | -131.642421     | 55.341255  |
| 10 | Bayannur         | CHN     | China          | Ulanu Lake                        | Sep 8                      | 108.836444      | 40.885944  |
| 11 | Montreal (1)     | CAN     | Canada         | Parc La Fontaine (pond)           | Sep 2                      | -73.5679645     | 45.5232449 |
| 12 | Montreal (2)     | CAN     | Canada         | St Lawrence River (1)             | Sep 2                      | -73.5485275     | 45.5090203 |
| 13 | Montreal (3)     | CAN     | Canada         | St Lawrence River (2)             | Sep 2                      | -73.5467532     | 45.5081442 |
| 14 | Salyan           | AZE     | Azerbaijan     | Kür (Mtkvari) River               | Jun 3                      | 48.963551       | 39.630592  |
| 15 | Munich           | DEU     | Germany        | Isar River                        | Apr 30                     | 11.581167       | 48.128583  |
| 16 | Baotou (1)       | CHN     | China          | Yellow River                      | Sep 10                     | 109.987822      | 40.5128    |
| 17 | Göttingen (1)    | DEU     | Germany        | Leine River                       | May 1                      | 9.919656        | 51.542811  |
| 18 | Vancouver        | CAN     | Canada         | Strait of Georgia (Pacific Ocean) | Mar 18                     | -123.261953     | 49.262093  |
| 19 | Toronto          | CAN     | Canada         | Lake Ontario                      | Mar 2                      | -79.380009      | 43.639518  |
| 20 | Boqsmayya        | LBN     | Lebanon        | El-Jaouz River                    | May 1                      | 35.727279       | 34.271688  |
| 21 | Baotou (2)       | CHN     | China          | Yellow River (2)                  | Sep 10                     | 109.804561      | 40.500669  |
| 22 | Gananoque        | CAN     | Canada         | St Lawrence River (3)             | Feb 9                      | -76.158768      | 44.325066  |
| 23 | Casablanca       | MAR     | Morocco        | Atlantic Ocean                    | Mar 9                      | -7.640465       | 33.604793  |
| 24 | Venice           | ITA     | Italy          | Rio del Gozzi Canal               | Aug 6                      | 12.337964       | 45.44212   |
| 25 | Göttingen (2)    | DEU     | Germany        | Kiessee Lake                      | May 1                      | 9.921195        | 51.51951   |
| 26 | Edmonton (1)     | CAN     | Canada         | Saskatchewan River (1)            | May 14                     | -113.520076     | 53.5302    |
| 27 | Edmonton (2)     | CAN     | Canada         | Saskatchewan River (2)            | May 14                     | -113.525406     | 53.532853  |
| 28 | Edmonton (3)     | CAN     | Canada         | Saskatchewan River (3)            | May 14                     | -113.514956     | 53.531665  |
| 29 | Le Chambon-sl    | FRA     | France         | Lignon du Velay River             | Aug 8                      | 4.315863        | 45.052825  |
| 30 | London           | GBR     | United Kingdom | The Long Water Lake               | Mar 3                      | -0.173268       | 51.506563  |
| 31 | Durham           | USA     | United States  | - (stream)                        | Mar 25                     | -78.9526        | 35.9611    |
| 32 | Baku             | AZE     | Azerbaijan     | Caspian Sea                       | Jun 14                     | 49.800351       | 40.304766  |
| 33 | Sao Paulo (1)    | BRA     | Brazil         | Rio Passo River (1)               | Aug 19                     | -47.716875      | -22.419259 |
| 34 | Sao Paulo (2)    | BRA     | Brazil         | Rio Passo River (2)               | Aug 19                     | -47.720028      | -22.414361 |
| 35 | Lankaran         | AZE     | Azerbaijan     | Xanbulan Lake                     | June 8                     | 48.771991       | 38.66092   |
| 36 | Sólheimajökull   | ISL     | Iceland        | Sólheimajökull Glacier            | Feb 15                     | -20.634801      | 64.066452  |

**Table S2. Sampling information for global natural precipitation samples**

|    | City/town      | Country |               | Water type | Sampling date    | Geo coordinates  |                 |
|----|----------------|---------|---------------|------------|------------------|------------------|-----------------|
|    |                |         |               |            | <i>Year 2019</i> | <i>Longitude</i> | <i>Latitude</i> |
| 1  | Montreal       | CAN     | Canada        | rain       | Apr 26           | -73.616052       | 45.502324       |
| 2  | Toronto        | CAN     | Canada        | rain       | Mar 11           | -123.241472      | 49.264229       |
| 3  | Vancouver      | CAN     | Canada        | rain       | Sep 3            | -79.394651       | 43.657773       |
| 4  | West Lafayette | USA     | United States | rain       | Apr 12           | -86.955001       | 40.438851       |
| 5  | Durham         | USA     | United States | rain       | Mar 3            | -78.9527         | 35.9613         |
| 6  | Sao Paulo      | BRA     | Brazil        | rain       | Aug 4            | -47.552083       | -22.398778      |
| 7  | Munich         | DEU     | Germany       | rain       | Apr 29           | 11.580363        | 48.13405        |
| 8  | Gottingen      | DEU     | Germany       | rain       | Apr 30           | 9.923772         | 51.531163       |
| 9  | Baku           | AZE     | Azerbaijan    | rain       | Jun 8            | 49.84392         | 40.37331        |
| 10 | Hohhot         | CHN     | China         | rain       | Aug 3            | 111.68502        | 40.75769        |



**Table S3. Nanoparticle measurements on surface water samples.** Measurements were performed by a high-sensitivity sector-field single-particle ICP-MS. NP mass concentrations were calculated by assuming that all Ti-, Ce- and Ag-containing NPs occurred in the forms of TiO<sub>2</sub>, CeO<sub>2</sub> and Ag, respectively. ND stands for “not detected” and refers to concentrations that were below the detection limits of the technique. N/A refers to samples that were not analyzed.

| Region/territory |                | NP number concentrations (NP mL <sup>-1</sup> ) |                           |                           | NP mass concentration (ng L <sup>-1</sup> ) |                  |               |
|------------------|----------------|-------------------------------------------------|---------------------------|---------------------------|---------------------------------------------|------------------|---------------|
|                  |                | Ti-NPs                                          | Ce-NPs                    | Ag-NPs                    | TiO <sub>2</sub>                            | CeO <sub>2</sub> | Ag            |
| 1                | Yukon (1)      | (5.4±1.0)×10 <sup>3</sup>                       | (7.5±1.8)×10 <sup>3</sup> | (3.6±1.8)×10 <sup>3</sup> | 2.1 ± 0.7                                   | 0.13 ± 0.06      | 0.025 ± 0.010 |
| 2                | Yukon (2)      | (1.2±0.2)×10 <sup>4</sup>                       | (1.5±0.5)×10 <sup>4</sup> | ND                        | 1.9 ± 0.2                                   | 0.27 ± 0.15      | ND            |
| 3                | Yukon (3)      | (7.9±0.4)×10 <sup>4</sup>                       | (2.9±1.0)×10 <sup>4</sup> | (3.7±0.7)×10 <sup>3</sup> | 8.8 ± 1.0                                   | 0.52 ± 0.17      | 0.016 ± 0.006 |
| 4                | Yukon (4)      | (6.0±0.2)×10 <sup>4</sup>                       | (1.2±0.1)×10 <sup>5</sup> | (3.7±0.8)×10 <sup>3</sup> | 7.8 ± 1.7                                   | 2.03 ± 0.16      | 0.010 ± 0.002 |
| 5                | Nijmegen       | (5.2±3.1)×10 <sup>3</sup>                       | (6.3±4.5)×10 <sup>4</sup> | ND                        | 1.5 ± 0.7                                   | 0.57 ± 0.39      | ND            |
| 6                | Arnhem (1)     | (1.7±1.2)×10 <sup>4</sup>                       | (1.8±1.1)×10 <sup>4</sup> | ND                        | 5.8 ± 5.6                                   | 0.14 ± 0.10      | ND            |
| 7                | Arnhem (2)     | (3.0±3.3)×10 <sup>3</sup>                       | (2.5±0.0)×10 <sup>4</sup> | ND                        | 0.6 ± 0.7                                   | 0.25 ± 0.12      | ND            |
| 8                | Juneau         | (3.9±1.5)×10 <sup>4</sup>                       | (5.9±1.0)×10 <sup>4</sup> | ND                        | 8.4 ± 4.6                                   | 0.15 ± 0.02      | ND            |
| 9                | Ketchikan      | (1.1±0.0)×10 <sup>4</sup>                       | (2.2±0.6)×10 <sup>4</sup> | ND                        | 1.1 ± 0.0                                   | 0.07 ± 0.02      | ND            |
| 10               | Bayannur       | (2.0±1.0)×10 <sup>4</sup>                       | (1.9±0.3)×10 <sup>5</sup> | (2.3±3.7)×10 <sup>3</sup> | 6.4 ± 4.8                                   | 1.66 ± 0.26      | 0.024 ± 0.038 |
| 11               | Montreal (1)   | (1.9±0.1)×10 <sup>4</sup>                       | (2.8±0.3)×10 <sup>4</sup> | ND                        | 5.4 ± 0.6                                   | 0.12 ± 0.01      | ND            |
| 12               | Montreal (2)   | (1.2±0.0)×10 <sup>5</sup>                       | (1.8±0.1)×10 <sup>5</sup> | ND                        | 49.2 ± 0.8                                  | 1.04 ± 0.26      | ND            |
| 13               | Montreal (3)   | (2.5±0.0)×10 <sup>4</sup>                       | (4.2±0.0)×10 <sup>4</sup> | ND                        | 13.3 ± 1.1                                  | 0.49 ± 0.35      | ND            |
| 14               | Salyan         | (1.5±0.7)×10 <sup>5</sup>                       | (7.1±2.0)×10 <sup>5</sup> | (2.7±0.2)×10 <sup>3</sup> | 33.8 ± 12.8                                 | 4.67 ± 1.06      | 0.028 ± 0.005 |
| 15               | Munich         | (1.5±0.2)×10 <sup>5</sup>                       | (4.0±0.5)×10 <sup>5</sup> | (1.7±0.4)×10 <sup>3</sup> | 75.1 ± 11.5                                 | 2.74 ± 0.49      | 0.025 ± 0.007 |
| 16               | Baotou (1)     | (1.6±0.4)×10 <sup>5</sup>                       | (7.3±2.1)×10 <sup>5</sup> | ND                        | 32.7 ± 5.0                                  | 10.07 ± 3.55     | ND            |
| 17               | Göttingen (1)  | (1.9±0.1)×10 <sup>5</sup>                       | (8.5±0.1)×10 <sup>5</sup> | (3.7±1.0)×10 <sup>3</sup> | 101.5 ± 20.6                                | 3.44 ± 0.17      | 0.105 ± 0.028 |
| 18               | Vancouver*     | (2.3±0)×10 <sup>5</sup>                         | (7.5±0)×10 <sup>3</sup>   | ND                        | 15.5                                        | 0.04             | ND            |
| 19               | Toronto        | (2.2±0.9)×10 <sup>5</sup>                       | (9.4±2.1)×10 <sup>4</sup> | (1.3±0.6)×10 <sup>5</sup> | 31.6 ± 9.5                                  | 0.51 ± 0.09      | 0.501 ± 0.253 |
| 20               | Boqsmayya      | (3.6±0.2)×10 <sup>5</sup>                       | (9.1±0.2)×10 <sup>5</sup> | (6.5±1.0)×10 <sup>4</sup> | 98.1 ± 8.5                                  | 8.44 ± 0.46      | 0.150 ± 0.038 |
| 21               | Baotou (2)     | (4.0±2.0)×10 <sup>5</sup>                       | N/A                       | ND                        | 114.4 ± 60.3                                | N/A              | ND            |
| 22               | Gananoque      | (4.6±1.8)×10 <sup>5</sup>                       | (3.1±0.3)×10 <sup>5</sup> | (1.5±1.1)×10 <sup>5</sup> | 92.0 ± 26.0                                 | 1.97 ± 0.28      | 0.367 ± 0.275 |
| 23               | Casablanca*    | (5.2±0)×10 <sup>5</sup>                         | (1.5±0)×10 <sup>4</sup>   | ND                        | 48.9                                        | 0.06             | ND            |
| 24               | Venice         | (8.0±1.8)×10 <sup>5</sup>                       | (1.1±0.3)×10 <sup>4</sup> | ND                        | 143.4 ± 113.5                               | 0.14 ± 0.10      | ND            |
| 25               | Göttingen (2)  | (1.0±0.0)×10 <sup>6</sup>                       | (4.1±0.1)×10 <sup>5</sup> | (2.9±0.2)×10 <sup>5</sup> | 190.3 ± 10.0                                | 2.83 ± 0.08      | 1.290 ± 0.105 |
| 26               | Edmonton (1)   | (2.0±0.7)×10 <sup>6</sup>                       | (1.1±0.3)×10 <sup>6</sup> | (1.7±0.5)×10 <sup>4</sup> | 954.1 ± 439.5                               | 20.39 ± 4.46     | 0.188 ± 0.016 |
| 27               | Edmonton (2)   | (1.2±0.3)×10 <sup>6</sup>                       | N/A                       | (2.7±2.0)×10 <sup>4</sup> | 494.1 ± 86.1                                | N/A              | 0.148 ± 0.060 |
| 28               | Edmonton (3)   | (1.3±0.4)×10 <sup>6</sup>                       | N/A                       | (2.9±1.6)×10 <sup>4</sup> | 527.5 ± 125.7                               | N/A              | 0.678 ± 0.401 |
| 29               | Le Chambon-sl  | (1.9±0.3)×10 <sup>6</sup>                       | (2.6±0.9)×10 <sup>5</sup> | (5.1±2.2)×10 <sup>3</sup> | 332.0 ± 56.9                                | 4.75 ± 1.66      | 0.021 ± 0.008 |
| 30               | London         | (1.9±1.2)×10 <sup>6</sup>                       | (1.9±1.0)×10 <sup>5</sup> | (2.1±0.2)×10 <sup>4</sup> | 134.9 ± 45.9                                | 1.3 ± 0.65       | 0.066 ± 0.003 |
| 31               | Durham         | (2.9±1.2)×10 <sup>6</sup>                       | (1.5±0.2)×10 <sup>4</sup> | (1.8±0.8)×10 <sup>4</sup> | 524.0 ± 255.1                               | 0.18 ± 0.09      | 0.170 ± 0.150 |
| 32               | Baku*          | (3.8±0)×10 <sup>6</sup>                         | ND                        | ND                        | 347.1 ± 0                                   | ND               | ND            |
| 33               | Sao Paulo (1)  | (7.0±0.6)×10 <sup>6</sup>                       | (4.7±1.1)×10 <sup>5</sup> | N/A                       | 2324.2 ± 131.6                              | 7.86 ± 1.98      | N/A           |
| 34               | Sao Paulo (2)  | (6.8±1.2)×10 <sup>6</sup>                       | (4.3±0.8)×10 <sup>5</sup> | N/A                       | 2262.2 ± 422.5                              | 7.53 ± 1.60      | N/A           |
| 35               | Lankaran       | (1.2±0.2)×10 <sup>7</sup>                       | (1.5±0.1)×10 <sup>6</sup> | (9.3±1.4)×10 <sup>3</sup> | 2961.0 ± 318.0                              | 78.10 ± 4.0      | 0.092 ± 0.039 |
| 36               | Sólheimajökull | (1.5±0.0)×10 <sup>7</sup>                       | (2.3±0.0)×10 <sup>6</sup> | ND                        | 3140.7 ± 68.0                               | 19.45 ± 1.50     | ND            |

**Table S4. Nanoparticle measurements on natural precipitation samples.** Measurements were performed by a high-sensitivity sector-field single-particle ICP-MS. NP mass concentrations were calculated by assuming that all Ti-, Ce- and Ag-containing NPs occurred in the forms of TiO<sub>2</sub>, CeO<sub>2</sub> and Ag, respectively. N/A refers to samples that were not analyzed.

|    | City/town      | NP number concentrations (NP mL <sup>-1</sup> ) |                           |                           | NP mass concentration (ng L <sup>-1</sup> ) |                  |               |
|----|----------------|-------------------------------------------------|---------------------------|---------------------------|---------------------------------------------|------------------|---------------|
|    |                | Ti-NPs                                          | Ce-NPs                    | Ag-NPs                    | TiO <sub>2</sub>                            | CeO <sub>2</sub> | Ag            |
| 1  | Montreal       | (2.3±1.6)×10 <sup>6</sup>                       | (3.5±2.3)×10 <sup>5</sup> | (2.6±0.2)×10 <sup>4</sup> | 89.7 ± 3.3                                  | 2.3 ± 1.5        | 0.040 ± 0.010 |
| 2  | Toronto        | (7.0±0.1)×10 <sup>4</sup>                       | N/A                       | (2.4±0.1)×10 <sup>3</sup> | 1.7 ± 0.1                                   | N/A              | 0.026 ± 0.010 |
| 3  | Vancouver      | (1.2±0.0)×10 <sup>4</sup>                       | ND                        | (9.9±1.3)×10 <sup>2</sup> | 26.1 ± 2.8                                  | ND               | 0.026 ± 0.010 |
| 4  | West Lafayette | (1.9±1.3)×10 <sup>5</sup>                       | (9.3±7.5)×10 <sup>4</sup> | (2.6±2.3)×10 <sup>3</sup> | 42.8 ± 29.4                                 | 0.5 ± 0.4        | 0.014 ± 0.008 |
| 5  | Durham         | (9.4±0.2)×10 <sup>4</sup>                       | (2.4±0.0)×10 <sup>4</sup> | (1.0±0.1)×10 <sup>3</sup> | 24.0 ± 0.3                                  | 0.1 ± 0.0        | 0.006 ± 0.001 |
| 6  | Sao Paulo      | (2.0±0.0)×10 <sup>6</sup>                       | (2.8±1.2)×10 <sup>5</sup> | (1.0±0.1)×10 <sup>3</sup> | 846.8 ± 8.4                                 | 3.8 ± 1.6        | 0.005 ± 0.001 |
| 7  | Munich         | (9.8±0.3)×10 <sup>4</sup>                       | (1.0±0.1)×10 <sup>5</sup> | (8.0±4.4)×10 <sup>3</sup> | 31.0 ± 3.0                                  | 1.0 ± 0.2        | 0.044 ± 0.005 |
| 8  | Göttingen      | (9.5±0.2)×10 <sup>4</sup>                       | (8.1±1.0)×10 <sup>4</sup> | (3.1±0.1)×10 <sup>4</sup> | 40.6 ± 2.2                                  | 0.4 ± 0.1        | 0.094 ± 0.010 |
| 9  | Baku           | (2.7±0.4)×10 <sup>5</sup>                       | (3.1±2.2)×10 <sup>5</sup> | (5.0±2.2)×10 <sup>3</sup> | 86.8 ± 24.9                                 | 2.5 ± 1.2        | 0.035 ± 0.018 |
| 10 | Hohhot         | (2.7±0.0)×10 <sup>5</sup>                       | (1.1±0.0)×10 <sup>5</sup> | (1.0±0.1)×10 <sup>5</sup> | 119.0 ± 4.2                                 | 2.3 ± 0.4        | 0.281 ± 0.017 |

## REFERENCES

1. Hadioui, M.; Knapp, G. v.; Azimzada, A.; Jreije, I.; Frechette-Viens, L.; Wilkinson, K. J. Lowering the size detection limits of Ag and TiO<sub>2</sub> nanoparticles by Single Particle ICP-MS. *Anal. Chem.* **2019**, *91* (20), 13275-13284.
